# Supplementary material for: Exploring Factors Affecting Graduate Students’ Satisfaction toward E-Learning in the Era of the COVID-19 Crisis
Source: MDPI journal article supplement (doi:10.3390/ejihpe12080079), 2022-08-15
Supplement: s1 [file s1]

## Supplementary Materials

**Table S1: Descriptive statistics of instrument used in the current study.**

| Symbols                                                  | Statements                                                                                                                            | M    | SD    | Skew<br>≤ 3 | Kurt<br>≤ 3 | $\alpha$<br>≥ .70 | $\Omega$<br>≥ .70 |
|----------------------------------------------------------|---------------------------------------------------------------------------------------------------------------------------------------|------|-------|-------------|-------------|-------------------|-------------------|
| <b>Student–Instructor Interaction*1</b>                  |                                                                                                                                       |      |       |             |             |                   |                   |
| Q1SII                                                    | The instructors encouraged me to become actively involved in the course discussions                                                   | 3.56 | .941  | -.746       | .645        | .710              | .711              |
| Q2SII                                                    | The instructors provided me feedback on my work through comments                                                                      | 3.54 | 1.002 | -.831       | .405        | .686              | .690              |
| Q3SII                                                    | I was able to interact with the instructors during the course discussions                                                             | 3.76 | .861  | -.776       | .591        | .709              | .712              |
| Q4SII                                                    | The instructors treated me individually                                                                                               | 3.29 | .927  | -.365       | -.184       | .725              | .726              |
| Q5SII                                                    | The instructors informed me about my progress periodically                                                                            | 3.12 | .957  | -.431       | -.351       | .716              | .720              |
|                                                          |                                                                                                                                       |      |       |             |             | .753              | .755              |
| <b>Instructor’s Performance Quality*2</b>                |                                                                                                                                       |      |       |             |             |                   |                   |
| Q1IPQ                                                    | Overall, these instructors were effective                                                                                             | 3.69 | .811  | -.741       | .979        | .689              | .704              |
| Q2IPQ                                                    | The instructors were available for consultation during office hours or by appointment                                                 | 3.67 | .786  | -.519       | .463        | .769              | .778              |
| Q3IPQ                                                    | The instructors stimulated students’ learning                                                                                         | 3.71 | .812  | -.728       | .773        | .663              | .673              |
| Q4IPQ                                                    | The instructors treated all students fairly                                                                                           | 3.76 | .966  | -.983       | .850        | .717              | .726              |
|                                                          |                                                                                                                                       |      |       |             |             | .767              | .776              |
| <b>Course Evaluation (CE)*3</b>                          |                                                                                                                                       |      |       |             |             |                   |                   |
| Q1CE                                                     | Overall, I have valuable learning experiences from my courses                                                                         | 3.71 | .899  | -.842       | .750        | .847              | .848              |
| Q2CE                                                     | The assignments were relevant and useful                                                                                              | 3.70 | .883  | -.838       | .855        | .845              | .846              |
| Q3CE                                                     | Courses materials were relevant and useful                                                                                            | 3.78 | .871  | -.900       | 1.034       | .837              | .838              |
| Q4CE                                                     | Expectations were clearly stated either verbally or in the syllabus                                                                   | 3.73 | .844  | -.743       | .799        | .852              | .854              |
| Q5CE                                                     | The testing and evaluation procedures were fair                                                                                       | 3.56 | .899  | -.888       | 1.079       | .849              | .850              |
| Q6CE                                                     | The workload was appropriate for the hours of credit                                                                                  | 3.55 | .813  | -.436       | -.175       | .843              | .843              |
|                                                          |                                                                                                                                       |      |       |             |             | .868              | .869              |
| <b>Students’ Social Presence in E-Learning Courses*4</b> |                                                                                                                                       |      |       |             |             |                   |                   |
| Q1SSPIEC                                                 | The instructor facilitated discussions in the course                                                                                  | 3.62 | .800  | -.871       | 1.214       | .873              | .883              |
| Q2SSPIEC                                                 | I feel comfortable interacting with other participants in the online course                                                           | 3.45 | 1.04  | -.603       | -.126       | .868              | .879              |
| Q3SSPIEC                                                 | I feel comfortable participating in the course discussions                                                                            | 3.58 | 1.02  | -.827       | .263        | .866              | .877              |
| Q4SSPIEC                                                 | I feel comfortable conversing through this text-based medium                                                                          | 3.55 | .920  | -.689       | .533        | .868              | .879              |
| Q5SSPIEC                                                 | Computer-mediated communication is an excellent medium for social interaction                                                         | 3.48 | .999  | -.725       | .235        | .875              | .885              |
| Q6SSPIEC                                                 | The instructor created a feeling of an online community                                                                               | 3.45 | .933  | -.760       | .363        | .869              | .880              |
| Q7SSPIEC                                                 | I am able to form distinct individual impressions of some course participants even though we communicate online                       | 3.43 | .880  | -.395       | .106        | .872              | .882              |
| Q8SSPIEC                                                 | The introductions enabled me to form a sense of online community                                                                      | 3.45 | .899  | -.624       | .263        | .869              | .880              |
| Q9SSPIEC                                                 | Discussions using the medium of computer-mediated communication tend to be more impersonal (unfriendly) than face-to-face discussions | 3.30 | .975  | -.206       | -.451       | .899              | .904              |
| Q10SSPIEC                                                | I feel my point of view was acknowledged by other participants in the course                                                          | 3.44 | .807  | -.378       | .524        | .875              | .886              |
| Q11SSPIEC                                                | I feel comfortable introducing myself in the online course                                                                            | 3.42 | .968  | -.611       | .111        | .875              | .886              |
| Q12SSPIEC                                                | Messages in the online course are impersonal                                                                                          | 3.24 | .948  | -.194       | -.308       | .892              | .900              |

| Symbols                                                                           | Statements                                                                                                            | M    | SD    | Skew<br>$\leq 3$ | Kurt<br>$\leq 3$ | $\alpha$<br>$\geq .70$ | $\Omega$<br>$\geq .70$ |
|-----------------------------------------------------------------------------------|-----------------------------------------------------------------------------------------------------------------------|------|-------|------------------|------------------|------------------------|------------------------|
|                                                                                   |                                                                                                                       |      |       |                  |                  | .885                   | .894                   |
| <b>System Quality (SQ)*5</b>                                                      |                                                                                                                       |      |       |                  |                  |                        |                        |
| Q1SQ                                                                              | The system is easy to use                                                                                             | 3.65 | .947  | -.857            | .757             | .780                   | .784                   |
| Q2SQ                                                                              | The system is user friendly                                                                                           | 3.71 | .806  | -1.08            | 1.597            | .763                   | .766                   |
| Q3SQ                                                                              | The system is easy to learn                                                                                           | 3.71 | .876  | -1.08            | 1.432            | .775                   | .785                   |
| Q4SQ                                                                              | The operation of the system is stable                                                                                 | 3.40 | .904  | -.493            | -.169            | .816                   | .819                   |
|                                                                                   |                                                                                                                       |      |       |                  |                  | .828                   | .833                   |
| <b>Students' Awareness Towards the Use of E-Learning in Educational Process*6</b> |                                                                                                                       |      |       |                  |                  |                        |                        |
| Q1ASTUEEP                                                                         | There is a need now, and in the future for e-learning, and it will become an integral part of the educational process | 3.83 | .886  | -.985            | 1.605            | .869                   | .895                   |
| Q2ASTUEEP                                                                         | E-learning is suitable for what I study                                                                               | 3.33 | 1.176 | -.499            | -.611            | .865                   | .893                   |
| Q3ASTUEEP                                                                         | E-learning allows you to more effectively organize learning process                                                   | 3.39 | 1.065 | -.561            | -.163            | .865                   | .893                   |
| Q4ASTUEEP                                                                         | E-learning allows the use of modern teaching resources                                                                | 3.79 | .908  | -.963            | 1.137            | .869                   | .894                   |
| Q5ASTUEEP                                                                         | E-learning increases the level of my ICT competencies                                                                 | 3.73 | .948  | -.786            | .500             | .871                   | .898                   |
| Q6ASTUEEP                                                                         | I am ready to be trained (already trained) with using e-learning courses                                              | 3.70 | .929  | -.925            | .841             | .870                   | .896                   |
| Q7ASTUEEP                                                                         | E-learning is an extra work                                                                                           | 3.21 | 1.055 | -.219            | -.677            | .908                   | .919                   |
| Q8ASTUEEP                                                                         | Use of e-learning elements in full-time educational form is not preferable                                            | 3.51 | 1.003 | -.663            | -.002            | .900                   | .917                   |
| Q9ASTUEEP                                                                         | I prefer using of e-learning elements partially with educational methods                                              | 3.56 | .933  | -.907            | .638             | .873                   | .899                   |
| Q10ASTUEEP                                                                        | E-learning helps you turn to additional educational material                                                          | 3.60 | .912  | -.891            | .810             | .869                   | .895                   |
| Q11ASTUEEP                                                                        | E-learning enhanced the educational process by enhancing the communication between the teacher and the student        | 3.40 | .941  | -.527            | .057             | .870                   | .898                   |
| Q12ASTUEEP                                                                        | Working with the electronic course is a valuable use of time and useful                                               | 3.53 | .963  | -.576            | .014             | .868                   | .894                   |
| Q13ASTUEEP                                                                        | The quality of the e-learning course matches today's level of education                                               | 3.50 | .947  | -.607            | .298             | .866                   | .893                   |
| Q14ASTUEEP                                                                        | E-learning can replace laboratory and practical learning with a lot of practice and lecture                           | 2.90 | 1.207 | -.187            | -<br>1.034       | .876                   | .902                   |
| Q15ASTUEEP                                                                        | E-learning can be used in all subjects                                                                                | 2.80 | 1.214 | .017             | -<br>1.068       | .868                   | .897                   |
| Q16ASTUEEP                                                                        | In E-learning the quantity and quality of the knowledge obtained corresponds to the time spent                        | 3.37 | .930  | -.572            | .176             | .870                   | .897                   |
|                                                                                   |                                                                                                                       |      |       |                  |                  | .881                   | .905                   |
| <b>Students' Satisfaction (SS)*7</b>                                              |                                                                                                                       |      |       |                  |                  |                        |                        |
| Q1LS                                                                              | I am satisfied with this program                                                                                      | 3.53 | 1.048 | -.788            | .254             | .930                   | .931                   |
| Q2LS                                                                              | Distance education is worth my time                                                                                   | 3.47 | 1.102 | -.588            | -.355            | .925                   | .925                   |
| Q3LS                                                                              | I enjoy studying by distance                                                                                          | 3.28 | 1.125 | -.443            | -.530            | .917                   | .917                   |
| Q4LS                                                                              | Distance education is stimulating                                                                                     | 3.19 | 1.016 | -.358            | -.288            | .921                   | .921                   |
| Q5LS                                                                              | Distance education is exciting                                                                                        | 3.16 | 1.057 | -.350            | -.532            | .923                   | .923                   |
| Q6LS                                                                              | I look forward to learning by distance                                                                                | 3.18 | 1.124 | -.398            | -.664            | .915                   | .916                   |
| Q7LS                                                                              | I prefer distance education                                                                                           | 2.98 | 1.187 | -.110            | -.897            | .915                   | .915                   |
|                                                                                   |                                                                                                                       |      |       |                  |                  | .931                   | .932                   |

M: mean; SD: standard deviation; Skew: skewness; Kurt: kurtosis;  $\alpha$ : Cronbach's alpha,  $\omega$  = McDonald's omega.

**Table S2. Parameters and outer loading of hypothesized model**

|                                               | <b>Original Sample<br/>(O)</b> | <b>Standard Deviation<br/>(STDEV)</b> | <b>T Statistics<br/>( O/STDEV )</b> | <b>P<br/>Values</b> |
|-----------------------------------------------|--------------------------------|---------------------------------------|-------------------------------------|---------------------|
| <b>Students' Factors</b>                      |                                |                                       |                                     |                     |
| SF-> ASTUEEP_F                                | 0.847                          | 0.019                                 | 43.692                              | <0.001              |
| SF-> SIIPC_                                   | 0.730                          | 0.056                                 | 12.975                              | <0.001              |
| SF-> SSPIEC_F                                 | 0.881                          | 0.018                                 | 50.022                              | <0.001              |
| <b>Students' Social Presence</b>              |                                |                                       |                                     |                     |
| Presence -> Q10SSPIEC                         | 0.654                          | 0.043                                 | 15.295                              | <0.001              |
| Presence -> Q11SSPIEC                         | 0.681                          | 0.043                                 | 15.870                              | <0.001              |
| Presence -> Q1SSPIEC                          | 0.729                          | 0.036                                 | 20.388                              | <0.001              |
| Presence -> Q2SSPIEC                          | 0.807                          | 0.026                                 | 30.602                              | <0.001              |
| Presence -> Q3SSPIEC                          | 0.823                          | 0.025                                 | 33.073                              | <0.001              |
| Presence -> Q4SSPIEC                          | 0.783                          | 0.034                                 | 22.906                              | <0.001              |
| Presence -> Q5SSPIEC                          | 0.702                          | 0.043                                 | 16.410                              | <0.001              |
| Presence -> Q6SSPIEC                          | 0.778                          | 0.034                                 | 22.791                              | <0.001              |
| Presence -> Q7SSPIEC                          | 0.736                          | 0.038                                 | 19.383                              | <0.001              |
| Presence -> Q8sspiec                          | 0.764                          | 0.034                                 | 22.792                              | <0.001              |
| <b>Students' Awareness on Online Learning</b> |                                |                                       |                                     |                     |
| Awareness -> Q10ASTUEEP                       | 0.748                          | 0.037                                 | 20.296                              | <0.001              |
| Awareness -> Q11ASTUEEP                       | 0.683                          | 0.041                                 | 16.585                              | <0.001              |
| Awareness -> Q12ASTUEEP                       | 0.774                          | 0.035                                 | 21.949                              | <0.001              |
| Awareness -> Q13ASTUEEP                       | 0.803                          | 0.029                                 | 27.843                              | <0.001              |
| Awareness -> Q15ASTUEEP                       | 0.669                          | 0.035                                 | 19.214                              | <0.001              |
| Awareness -> Q16ASTUEEP                       | 0.697                          | 0.051                                 | 13.531                              | <0.001              |
| Awareness -> Q1ASTUEEP                        | 0.754                          | 0.033                                 | 22.700                              | <0.001              |
| Awareness -> Q2ASTUEEP                        | 0.797                          | 0.028                                 | 28.364                              | <0.001              |
| Awareness -> Q3ASTUEEP                        | 0.815                          | 0.030                                 | 27.169                              | <0.001              |
| Awareness -> Q4ASTUEEP                        | 0.769                          | 0.035                                 | 21.871                              | <0.001              |
| Awareness -> Q5ASTUEEP                        | 0.682                          | 0.045                                 | 15.277                              | <0.001              |
| Awareness -> Q6ASTUEEP                        | 0.722                          | 0.038                                 | 19.089                              | <0.001              |
| Awareness -> Q9ASTUEEP                        | 0.652                          | 0.041                                 | 15.737                              | <0.001              |
| <b>Student-Instructor Interaction</b>         |                                |                                       |                                     |                     |
| Interaction -> Q1SIIPC                        | 0.738                          | 0.035                                 | 20.808                              | <0.001              |
| Interaction -> Q2SIIPC                        | 0.734                          | 0.042                                 | 17.509                              | <0.001              |
| Interaction -> Q3SIIPC                        | 0.720                          | 0.038                                 | 18.919                              | <0.001              |
| Interaction -> Q4SIIPC                        | 0.664                          | 0.051                                 | 12.976                              | <0.001              |
| Interaction -> Q5SIIPC                        | 0.689                          | 0.037                                 | 18.464                              | <0.001              |
| SQ -> Q3SQ                                    | 1.000                          | 0.000                                 |                                     |                     |
| <b>Instructor's Performance (IP)</b>          |                                |                                       |                                     |                     |
| IP -> Q1IPQC                                  | 0.821                          | 0.022                                 | 37.405                              | <0.001              |
| IP -> Q2IPQC                                  | 0.643                          | 0.060                                 | 10.678                              | <0.001              |
| IP -> Q3IPQC                                  | 0.835                          | 0.023                                 | 36.391                              | <0.001              |
| IP -> Q4IPQC                                  | 0.769                          | 0.031                                 | 24.517                              | <0.001              |
| <b>Course Evaluation (CE)</b>                 |                                |                                       |                                     |                     |
| CE -> Q1CE                                    | 0.771                          | 0.033                                 | 23.203                              | <0.001              |
| CE -> Q2CE                                    | 0.774                          | 0.038                                 | 20.623                              | <0.001              |
| CE -> Q3CE                                    | 0.819                          | 0.025                                 | 32.189                              | <0.001              |
| CE -> Q4CE                                    | 0.739                          | 0.043                                 | 17.216                              | <0.001              |
| CE -> Q5CE                                    | 0.769                          | 0.036                                 | 21.387                              | <0.001              |
| CE -> Q6CE                                    | 0.788                          | 0.027                                 | 29.326                              | <0.001              |
| <b>Students' Satisfaction (SS)</b>            |                                |                                       |                                     |                     |
| SS -> Q1LS                                    | 0.786                          | 0.027                                 | 29.053                              | <0.001              |

# Supplementary Material

|            |       |       |        |        |
|------------|-------|-------|--------|--------|
| SS -> Q2LS | 0.813 | 0.030 | 27.138 | <0.001 |
| SS -> Q3LS | 0.869 | 0.017 | 49.696 | <0.001 |
| SS -> Q4LS | 0.834 | 0.023 | 36.646 | <0.001 |
| SS -> Q5LS | 0.823 | 0.029 | 27.980 | <0.001 |
| SS -> Q6LS | 0.876 | 0.017 | 50.599 | <0.001 |
| SS -> Q7LS | 0.881 | 0.015 | 60.455 | <0.001 |
